# Supplementary material
Source: ML conference proceedings conference paper supplement (https://openaccess.thecvf.com/content/ICCV2021/html/Chen_Hierarchical_Aggregation_for_ICCV_2021_paper.html)
Supplement: Supplementary file 1 [file Chen_Hierarchical_Aggregation_for_ICCV_2021_supplemental.pdf]

# Hierarchical Aggregation for 3D Instance Segmentation

## Supplementary Material

Shaoyu Chen<sup>1</sup> Jiemin Fang<sup>2,1</sup> Qian Zhang<sup>3</sup> Wenyu Liu<sup>1</sup> Xinggong Wang<sup>1†</sup>

<sup>1</sup> School of EIC, Huazhong University of Science & Technology

<sup>2</sup> Institute of AI, Huazhong University of Science & Technology

<sup>3</sup> Horizon Robotics

{shaoyuchen, jaminfang, liuwuy, xgwang}@hust.edu.cn {qian01.zhang}@horizon.ai

In this supplementary material, we provide the detailed inference latency of main individual components of HAIS and compare it with other methods. Besides, we provide more qualitative results to demonstrate the effectiveness of HAIS.

### A. Detailed Inference Time

Tab. 1 shows the inference time of main components of different methods. Compared with other methods which require time-consuming clustering and post processing procedures, our HAIS keeps a much more efficient pipeline. The point-wise prediction network, point aggregation, set aggregation and intra-instance prediction network takes 172, 125, 4 and 109 ms, respectively.

### B. Additional Qualitative Results

We show more qualitative results on the validation split of the ScanNet v2 dataset in Fig. 1. The predicted center shift vectors of some points are not accurate and a large amount of instance fragments come into being. By introducing the hierarchical aggregation and intra-instance prediction, HAIS generates fine-grained instance predictions.

### References

- [1] Angela Dai, Angel X. Chang, Manolis Savva, Maciej Halber, Thomas A. Funkhouser, and Matthias Nießner. ScanNet: Richly-annotated 3d reconstructions of indoor scenes. In *CVPR*, 2017.
- [2] Lei Han, Tian Zheng, Lan Xu, and Lu Fang. Occuseg: Occupancy-aware 3d instance segmentation. In *CVPR*, 2020.
- [3] Li Jiang, Hengshuang Zhao, Shaoshuai Shi, Shu Liu, Chi-Wing Fu, and Jiaya Jia. Pointgroup: Dual-set point grouping for 3d instance segmentation. In *CVPR*, 2020.
- [4] Shih-Hung Liu, Shang-Yi Yu, Shao-Chi Wu, Hwann-Tzong Chen, and Tyng-Luh Liu. Learning gaussian instance segmentation in point clouds. *arXiv:2007.09860*, 2020.
- [5] Weiyue Wang, Ronald Yu, Qianguai Huang, and Ulrich Neumann. SGPN: similarity group proposal network for 3d point cloud instance segmentation. In *CVPR*, 2018.
- [6] Xinlong Wang, Shu Liu, Xiaoyong Shen, Chunhua Shen, and Jiaya Jia. Associatively segmenting instances and semantics in point clouds. In *CVPR*, 2019.
- [7] Bo Yang, Jianan Wang, Ronald Clark, Qingyong Hu, Sen Wang, Andrew Markham, and Niki Trigoni. Learning object bounding boxes for 3d instance segmentation on point clouds. In *NeurIPS*, 2019.
- [8] Li Yi, Wang Zhao, He Wang, Minhyuk Sung, and Leonidas J. Guibas. GSPN: generative shape proposal network for 3d instance segmentation in point cloud. In *CVPR*, 2019.

Table 1. Inference time of main components of different methods on the ScanNet v2 validation set. For fair comparison, data in this table is measured on the same type of GPU (Titan X).

| Method         | Component inference time (msec)                                                                                                      | Per frame inference time (msec) |
|----------------|--------------------------------------------------------------------------------------------------------------------------------------|---------------------------------|
| SGPN [5]       | backbone (GPU): 2080<br>group merging (CPU): 149000<br>block merging (CPU): 7119                                                     | 158439                          |
| ASIS [6]       | backbone (GPU): 2083<br>mean shift (CPU): 172711<br>block merging (CPU): 7119                                                        | 181913                          |
| GSPN [8]       | backbone (GPU): 1612<br>point sampling (GPU): 9559<br>neighbour search (CPU): 1500                                                   | 12702                           |
| 3D-BoNet [7]   | backbone (GPU): 2083<br>SCN (GPU): 667<br>block merging (CPU): 7119                                                                  | 9202                            |
| OccuSeg [2]    | backbone GPU): 189<br>supervoxel (CPU): 1202<br>clustering (GPU+CPU): 513                                                            | 1904                            |
| PointGroup [3] | backbone (GPU): 128<br>clustering (GPU+CPU):221<br>ScoreNet (GPU): 103                                                               | 452                             |
| GICN [4]       | backbone (GPU): 1497<br>SCN (GPU): 667<br>block merging(CPU): 7119                                                                   | 8615                            |
| H AIS          | point-wise prediction(GPU): 172<br>point aggregation(GPU+CPU): 125<br>set aggregation(GPU): 4<br>intra-instance prediction(GPU): 109 | 410                             |

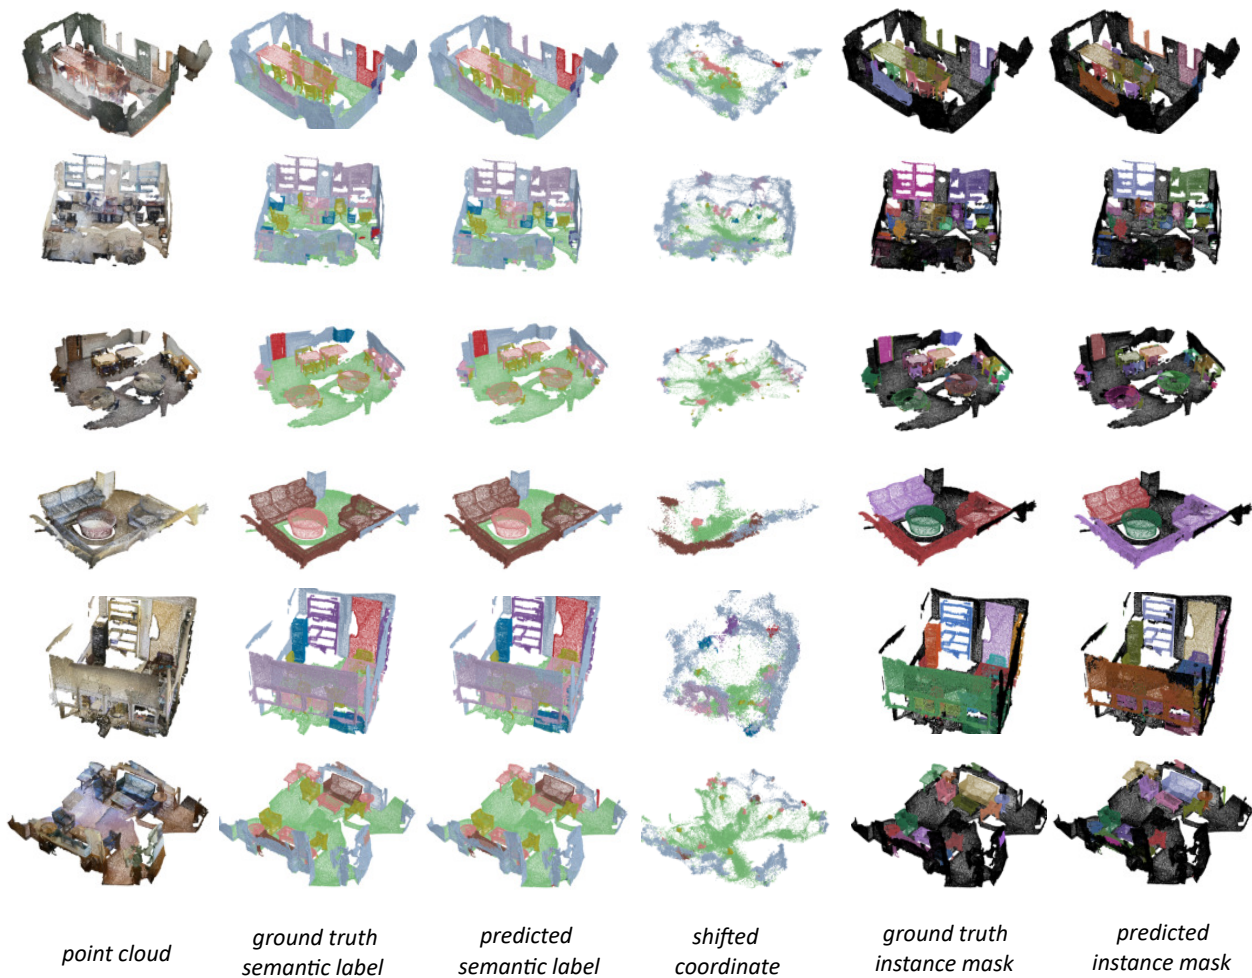

Figure 1. Qualitative results on ScanNet v2 [1]. From left to right: input point cloud, ground truth semantic label, predicted semantic label, shifted coordinate, ground truth instance mask and predicted instance mask. Best viewed in color.
